# Supplementary material for: A Mechanically Transmitted DNA Mycovirus Is Targeted by the Defence Machinery of Its Host, Botrytis cinerea
Source: MDPI journal article supplement (doi:10.3390/v13071315), 2021-07-07
Supplement: s1 [file s1]

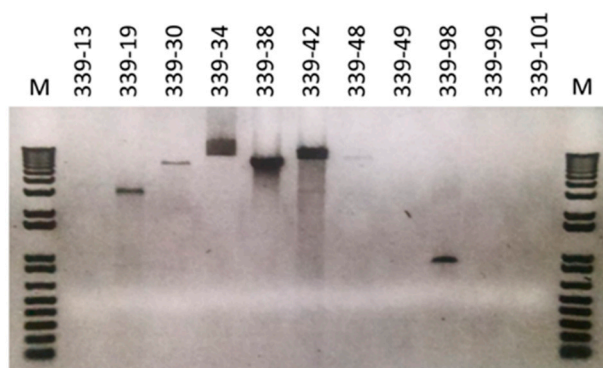

**Figure S1.** DsRNA profiling of BGDaV1-containing isolates reveals co-infections. M: 1kb Plus DNA molecular weight marker (Invitrogen).

**Supplementary Table S1.** Mechanical transmission and stability of BGDaV1. Presence (+) or absence (-) of BGDaV1 in different sub-cultures of newly developed progeny as detected by PCR.

|               | Experiment 1    |        |         | Experiment 2 |        |         | Experiment 3 |                |                |
|---------------|-----------------|--------|---------|--------------|--------|---------|--------------|----------------|----------------|
| Virus donor   | 339-13          | 339-49 | 339-101 | 339-13       | 339-49 | 339-101 | 339-13       | 339-49         | 339-101        |
| Sub-culture 1 | No transmission |        |         | +            | +      | +       | -            | + <sup>1</sup> | + <sup>1</sup> |
| Sub-culture 2 |                 |        |         | -            | +      | +       | -            | +              | +              |
| Sub-culture 3 |                 |        |         | -            | +      | -       | -            | -              | +              |

<sup>1</sup> isolates used for growth rate and virulence assessment.
